# Supplementary material
Source: HighWire-hosted journal article supplement (https://srh.bmj.com/content/bmjsrh-2020-200661)
Supplement: inline-supplementary-material-1 [file inline-supplementary-material-1.pdf]

## Topic Guide - Women's Experiences of EMA with Self-Administration of Misoprostol

- |                                                                                  |                                                                                                                                                                                                                                                                                                                                                                                                                                                                                                                                                                                                                                                                                                                                                                                                                                                                                                                                                                                                                                                                                                                                                           |
|----------------------------------------------------------------------------------|-----------------------------------------------------------------------------------------------------------------------------------------------------------------------------------------------------------------------------------------------------------------------------------------------------------------------------------------------------------------------------------------------------------------------------------------------------------------------------------------------------------------------------------------------------------------------------------------------------------------------------------------------------------------------------------------------------------------------------------------------------------------------------------------------------------------------------------------------------------------------------------------------------------------------------------------------------------------------------------------------------------------------------------------------------------------------------------------------------------------------------------------------------------|
| <b>Introduction</b>                                                              | <ul style="list-style-type: none"><li>• Study aims</li><li>• Queries, clarifications etc.</li></ul>                                                                                                                                                                                                                                                                                                                                                                                                                                                                                                                                                                                                                                                                                                                                                                                                                                                                                                                                                                                                                                                       |
| <b>General background</b>                                                        | <ul style="list-style-type: none"><li>• Age</li><li>• Life circumstances</li><li>• Area of residence, living situation</li></ul>                                                                                                                                                                                                                                                                                                                                                                                                                                                                                                                                                                                                                                                                                                                                                                                                                                                                                                                                                                                                                          |
| <b>Accessing abortion service</b>                                                | <ul style="list-style-type: none"><li>• Reasons for seeking abortion</li><li>• Decision making process<ul style="list-style-type: none"><li>○ What factors considered</li><li>○ Influence of others (i.e. family, friends, healthcare professionals etc.)</li></ul></li><li>• Sources of information about abortion accessed</li><li>• Experience of accessing abortion services (referral, access to clinic etc.)</li><li>• Experiences of the abortion service (initial consultation, appointment etc.)</li><li>• Experience of healthcare professionals during the process</li></ul>                                                                                                                                                                                                                                                                                                                                                                                                                                                                                                                                                                   |
| <b>EMA decision-making process</b>                                               | <ul style="list-style-type: none"><li>• What information was provided about the procedure/service</li><li>• How and when the option of EMA with self-administration of misoprostol was introduced</li><li>• How the option was described<ul style="list-style-type: none"><li>○ How were the potential benefits/drawbacks communicated</li></ul></li><li>• Did healthcare professionals seem to favour going home to pass the pregnancy over other options</li><li>• How they came to the decision that self-administration of misoprostol, and passing the pregnancy at home, was the best option. Probe around:<ul style="list-style-type: none"><li>○ Fitting in with clinic appointment times</li><li>○ Fitting in with work, family and other commitments; timing; travel</li><li>○ Influence of others on decision making</li></ul></li><li>• Did they feel they had enough time to think about, and decide on EMA with self-administration of misoprostol</li><li>• Explanation by HCPs about what would happen next<br/>Discussion of painkillers and contraception, instructions on self-management, post abortion pregnancy test etc.</li></ul> |
| <b>Experience of self-insertion of misoprostol and passing pregnancy at home</b> | <ul style="list-style-type: none"><li>• Decision about when to self-insert misoprostol to pass the pregnancy: fitting in with work, family and other commitments; timing; travel; flexibility to start the process of passing the pregnancy after clinic appointment</li><li>• Views and experiences of having another adult present during abortion process</li><li>• How they prepare (When? Where? How?)</li><li>• What was their experience of being at home to insert misoprostol and pass the pregnancy</li><li>• Benefits of being at home</li><li>• Drawbacks of being at home</li></ul>                                                                                                                                                                                                                                                                                                                                                                                                                                                                                                                                                          |

**Post-abortion care**

- Experience of follow-up and after-care (anti-D, post abortion pregnancy test etc.)
- What additional support was offered, if any (counselling etc.)
- Did they receive enough information about what to expect afterwards
  
- Were they aware of when and how to seek help
- What other information would they have liked (if any)
- Did they access any other sources of information about abortion (post-procedure)
- Did they experience any issues or problems, and if so how were these dealt with

**Overall experience of the service and future service provision**

- Any improvements/changes that could be made that would improve women's experience of abortion services (access to services, information, support etc.)
- What, if anything, could be improved in relation to passing pregnancy at home
- Would the option to have initial consultation online or by phone be beneficial
